# Supplementary material for: Heterointerface engineering in Cr2GaC/C hybrids through bottom-up template synthesis for enhanced electromagnetic wave absorption
Source: Royal Society of Chemistry journal article supplement (doi:10.1039/d4ta07294d), 2024-01-01
Supplement: d4ta07294d1.pdf [file d4ta07294d1.pdf]

## Supporting Information

### Heterointerface engineering in Cr<sub>2</sub>GaC/C hybrids through bottom-up template synthesis for enhanced electromagnetic wave absorption

Feiyue Hu<sup>1</sup>, Shengyu Xie<sup>1</sup>, Fushuo Wu<sup>1</sup>, Jian Liu<sup>1</sup>, Peigen Zhang<sup>1\*</sup>, Jianxing Ding<sup>2</sup>,  
Bingbing Fan<sup>3,4</sup>, Wei Zheng<sup>1\*</sup>, Longzhu Cai<sup>5</sup>, ZhengMing Sun<sup>1\*</sup>

1 School of Materials Science and Engineering, Southeast University, Nanjing 211189, P.R. China

2 School of Materials Science and Engineering, Anhui University of Technology, Ma'anshan, 243002, P.R. China

3 School of Materials Science and Engineering, Zhengzhou University, Zhengzhou 450001, P. R. China

4 Department of Engineering, Faculty of Environment, Science and Economy, University of Exeter, Exeter EX4 4QF, United Kingdom

5 The State Key Laboratory of Millimeter Waves, School of Information Science and Engineering, Southeast University, Nanjing 210096, P. R. China

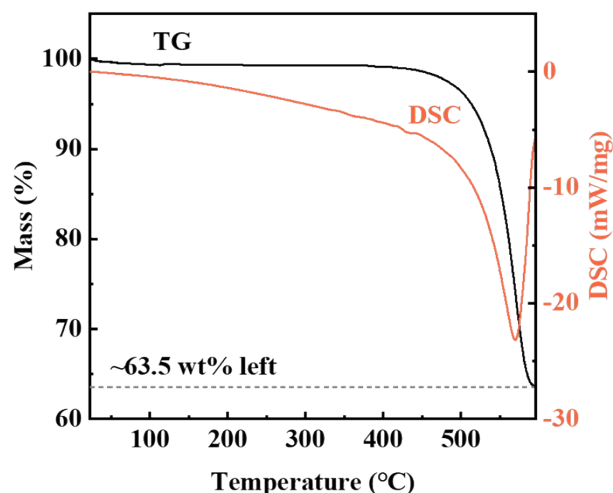

Figure S1. TG and DTA curves of Cr<sub>2</sub>GaC/C-2 sample.

\* Corresponding authors.

E-mail addresses: zhpeigen@seu.edu.cn, zhengwei22@seu.edu.cn, zmsun@seu.edu.cn.

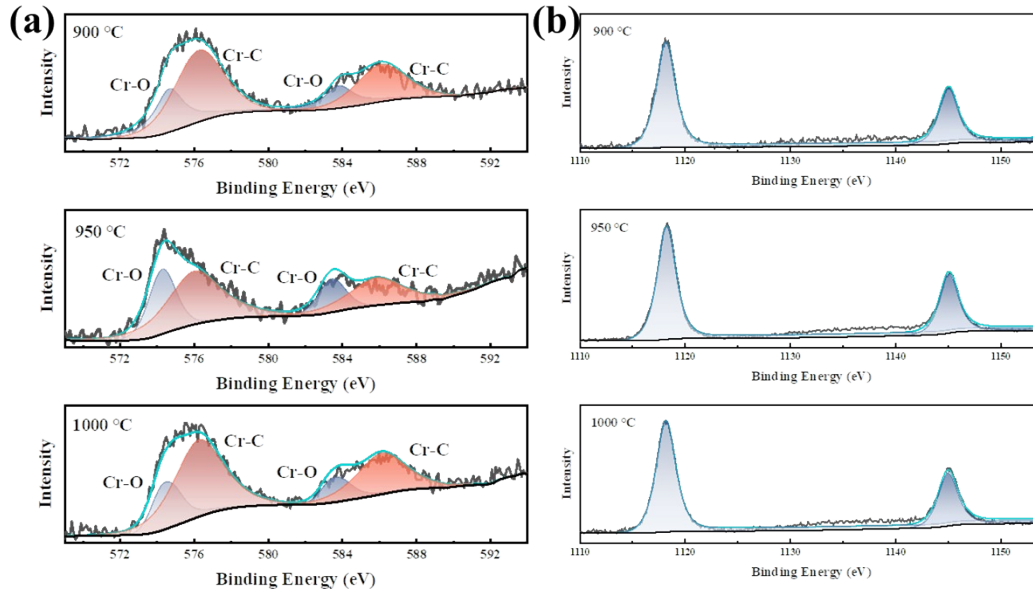

Figure S2. (a) Cr 2p spectra and (b) Ga 2p spectra of  $\text{Cr}_2\text{GaC/C-2}$  under different heat treatment temperatures.

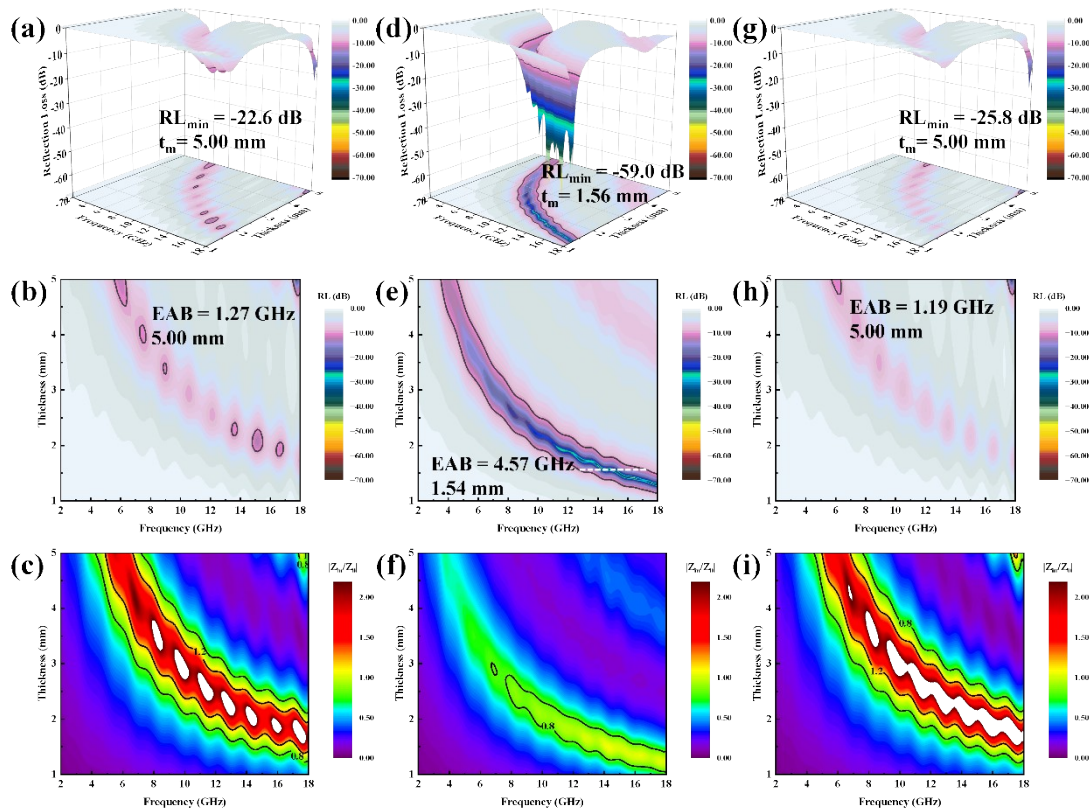

Figure S3. Three-dimensional representations, two-dimensional projection images of reflection loss values and  $|Z_{in}/Z_0|$  projection drawings of  $\text{Cr}_2\text{GaC-C}$  (Cotton) samples in paraffin with the same filling ratio of 15 wt.% (a, b, c)  $\text{Cr}_2\text{GaC/C-1}$ , (d, e, f)  $\text{Cr}_2\text{GaC/C-2}$ , (g, h, i)  $\text{Cr}_2\text{GaC/C-4}$ .

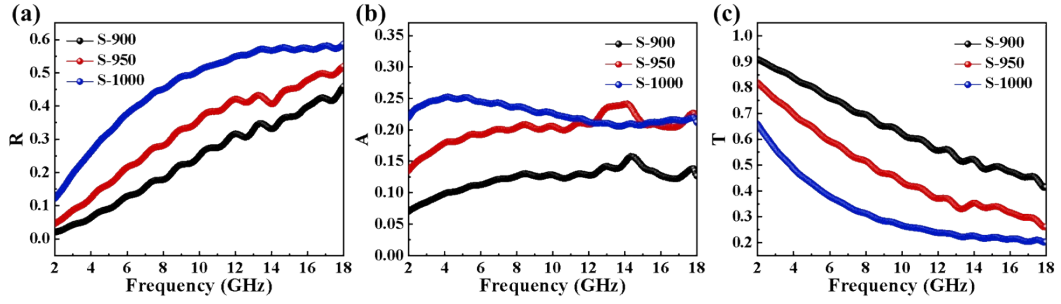

Figure S4. Power coefficients of (a) R, (b) A, and (c) T of all samples.

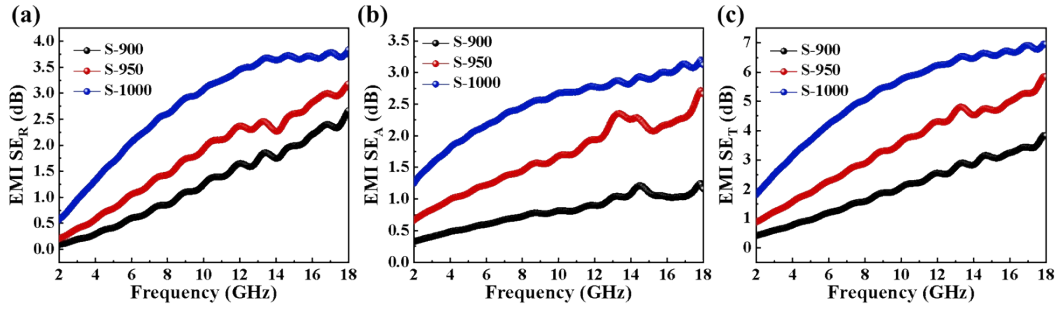

Figure S5. (a)  $SE_R$  value, (b)  $SE_A$  value, and (c)  $SE_T$  value of all samples.

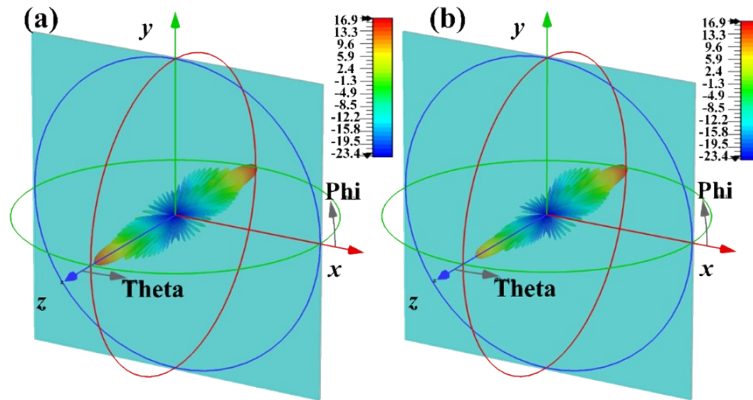

Figure S6. 3D RCS simulation results of PEC coated with (a) S-900, (b) S-950.

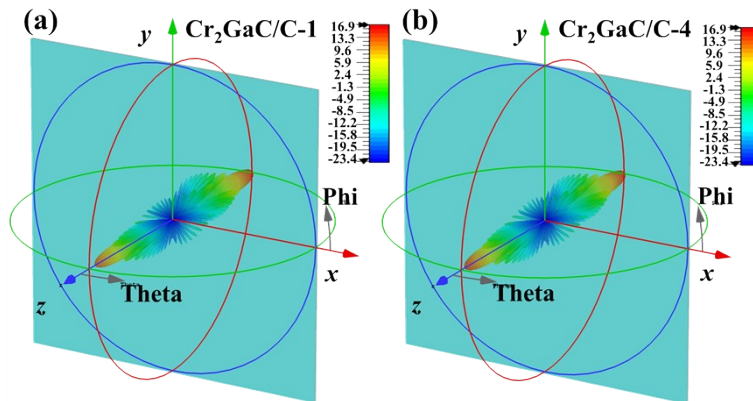

Figure S7. 3D RCS simulation results of PEC coated with (a)  $Cr_2GaC/C-1$ , (b)  $Cr_2GaC/C-4$ .
